# Supplementary material for: State-Independent and Dependent Neural Responses to Psychosocial Stress in Current and Remitted Depression
Source: Atypon-hosted journal article supplement (doi:10.1176/appi.ajp.2017.16080974), 2017-06-16
Supplement: appi.ajp.2017.16080974.ds001.pdf [file appi.ajp.2017.16080974.ds001.pdf]

## Supplemental Data

### Stress task and procedure

The Montreal Imaging Stress Task (MIST), a widely used stress paradigm and adapted for functional magnetic resonance imaging (fMRI), was induced the psychosocial stress by using elements of the uncontrollability and social evaluative threat. The MIST paradigm used a block design consisting of 3 different conditions (rest, control and experimental). The rest condition recorded a baseline state in 30 seconds and the interface of the computer program remained on the screen without tasks. Subjects were asked to keep their eyes open and not to press buttons until the next mental arithmetic task appeared. The control condition (90 seconds) aimed at recording brain activation related to mental arithmetic aspects of the task specifically that without stress components. The arithmetic tasks were presented as in the experimental condition, but without time pressure. Subjects were told to try to perform the task as quickly and accurately as possible. Average performance could reach to about 90% under the control condition. Finally, during the experimental condition (90 seconds), time pressure was induced by a time bar adapting to each subject's performance in order to enforce about 50% correct rate. Subjects received "correct" or "incorrect" feedback after each math question, and a simulative performance bar at the top of the screen showed that their performances were below the correct rate of the 'average subject', which was artificially set to 80% . The order of conditions was repeated once within a measurement sequence, resulting in a total duration of seven minutes. After each scanning run, the investigator criticized the subjects' insufficient performance via headphone (about 30 seconds), emphasizing the need

for better performance to enhance subjects' perceived stress. We investigated the contrasts experimental minus control to assess the effects of stress.

Four from eight saliva samples were collected in the scanner during the intervals of scanning sequences. Because of the constraints of the neuroimaging environment, the subjects were still in the scanner without movement when saliva collecting. The investigator placed the sterile salivette into the subject's mouth with sterile gloves. The subject was instructed to refrain from chewing on the salivette to minimize the head movement. After about 2 minutes (usually sufficient to saturate the salivette with saliva), the subject was asked to expel the salivette using the tip of the tongue so that the investigator can get it from his/her mouth. This procedure was repeated for each saliva sample obtained during scanning, and it was conducted after a negative verbal feedback between MIST runs.

### **Comparison of findings**

Several prior fMRI studies have used the MIST to investigate specific neural stress responses of some disorders, or to explore potential associations between cortisol responses and brain regional activation. Our results were not fully consistent with the findings of these studies, with some studies highlighting other brain regions. To make a clear presentation, we summarized the comparisons of previous and our findings in those brain regions highlighted by prior studies in STable 4.

### Supplementary references

1. Ashare RL, Lerman C, Cao W, Falcone M, Bernardo L, Ruparel K, Hopson R, Gur R, Pruessner JC, Loughhead J: Nicotine withdrawal alters neural responses to psychosocial stress. *Psychopharmacology* 2016; 233: 2459-2467.
2. Castro MN, Villarreal MF, Bolotinsky N, Papavero E, Goldschmidt MG, Costanzo EY, Drucaroff L, Wainsztein A, de Achaval D, Pahissa J, Bar KJ, Nemeroff CB, Guinjoan SM: Brain activation induced by psychological stress in patients with schizophrenia. *Schizophr Res* 2015; 168: 313-321.
3. Dedovic K, Duchesne A, Engert V, Lue SD, Andrews J, Efanov SI, Beaudry T, Pruessner JC: Psychological, endocrine and neural responses to social evaluation in subclinical depression. *Soc Cogn Affect Neurosci* 2014; 9: 1632-1644.
4. Lord C, Steiner M, Soares CN, Carew CL, Hall GB: Stress response in postpartum women with and without obsessive-compulsive symptoms: an fMRI study. *J Psychiatry Neurosci* 2012; 37: 78-86.
5. Pruessner JC, Dedovic K, Khalili-Mahani N, Engert V, Pruessner M, Buss C, Renwick R, Dagher A, Meaney MJ, Lupien S: Deactivation of the limbic system during acute psychosocial stress: evidence from positron emission tomography and functional magnetic resonance imaging studies. *Biol Psychiatry* 2008; 63: 234-240.
6. Soliman A, O'Driscoll GA, Pruessner J, Joobar R, Ditto B, Streicker E, Goldberg Y, Caro J, Rekkas PV, Dagher A: Limbic response to psychosocial stress in schizotypy: a functional magnetic resonance imaging study. *Schizophr Res* 2011; 131: 184-191.
7. Wheelock MD, Harnett NG, Wood KH, Orem TR, Granger DA, Mrug S, Knight DC: Prefrontal Cortex Activity Is Associated with Biobehavioral Components of the Stress Response. *Front Hum Neurosci* 2016; 10: 583.

**STable 1 Stress-induced Activation and Deactivation (experimental minus control condition).**

|                     | Region                    | Hemi-<br>sphere | MNI coordinate |     |       | <i>t</i> |
|---------------------|---------------------------|-----------------|----------------|-----|-------|----------|
|                     |                           |                 | x              | y   | z     |          |
| <b>Activation</b>   | Middle temporal gyrus     | R               | 48             | -66 | 0     | 17.20    |
|                     | Middle occipital gyrus    | R               | 18             | -93 | 9     | 15.85    |
|                     | Declive                   | R               | 24             | -72 | -18   | 14.70    |
|                     | Lingual gyrus             | R               | 21             | -75 | -15   | 14.33    |
|                     | Middle occipital gyrus    | L               | -18            | -93 | 12    | 14.27    |
|                     | Supplementary motor area  | R               | 3              | 0   | 51    | 14.24    |
|                     | Fusiform gyrus            | R               | 27             | -57 | -12   | 14.05    |
|                     | Declive                   | L               | -30            | -63 | -18   | 13.99    |
|                     | Cingulate gyrus           | R               | 3              | 12  | 42    | 13.90    |
|                     | Lingual gyrus             | L               | -21            | -72 | -9    | 13.87    |
|                     | Middle frontal gyrus      | R               | 27             | 3   | 57    | 13.86    |
|                     | Insula                    | L               | -33            | 15  | 3     | 12.19    |
|                     | Superior frontal gyrus    | R               | 30             | 42  | 30    | 12.12    |
|                     | Thalamus                  | R               | 3              | -18 | 6     | 11.84    |
|                     | Insula                    | R               | 33             | 18  | 3     | 11.29    |
| Thalamus            | L                         | -18             | -24            | 9   | 10.93 |          |
| <b>Deactivation</b> | Superior temporal gyrus   | R               | 39             | 12  | -39   | -11.48   |
|                     | Middle temporal gyrus     | L               | -39            | 9   | -36   | -10.11   |
|                     | Anterior cingulate cortex | L               | -6             | 30  | -6    | -10.03   |
|                     | Angular gyrus             | R               | 51             | -69 | 42    | -8.62    |
|                     | Medial prefrontal cortex  | L               | -3             | 36  | -9    | -7.80    |
|                     | Parahippocampal gyrus     | R               | 24             | -6  | -27   | -7.66    |
|                     | Angular gyrus             | L               | -39            | -78 | 45    | -7.16    |

All  $p < .001$ , family-wise error rate corrected.

**STable 2 Regions of a Main Effect of Group by ANOVA among Three Groups.**

| Region                         | Hemi-<br>sphere | MNI coordinate |     |    | <i>F</i> | $\eta^2$ |
|--------------------------------|-----------------|----------------|-----|----|----------|----------|
|                                |                 | x              | y   | z  |          |          |
| Precuneus                      | R               | 9              | -48 | 48 | 17.50    | .26      |
| Paracentral lobule             | L               | -12            | -33 | 54 | 15.12    | .23      |
| Ventromedial prefrontal cortex | L               | -6             | 42  | -9 | 14.55    | .22      |
| Middle cingulate cortex        | L               | -6             | -12 | 45 | 13.66    | .21      |
| Dorsolateral prefrontal cortex | L               | -24            | 42  | 21 | 12.11    | .19      |
| Caudate                        | R               | 18             | 18  | 6  | 10.50    | .17      |
| Putamen                        | L               | -21            | 9   | 6  | 9.83     | .16      |
| Putamen                        | R               | 24             | 15  | -3 | 9.07     | .15      |

All  $p < .001$ , uncorrected.

**STable 3 Comparison of Stress-related Activation among Three Groups with Controlling for Childhood Traumas.**

| Contrast                                           | Region                         | Hemi-sphere | MNI coordinate <sup>a</sup> |          |          | <i>t</i> | <i>p</i>    |                        | Cohen's <i>d</i> |
|----------------------------------------------------|--------------------------------|-------------|-----------------------------|----------|----------|----------|-------------|------------------------|------------------|
|                                                    |                                |             | <i>x</i>                    | <i>y</i> | <i>z</i> |          | uncorrected | corrected <sup>b</sup> |                  |
| Current depression > Healthy Control               | Precuneus                      | Right       | 9                           | -48      | 48       | 4.99     | <.001       | <.001                  | 1.19             |
|                                                    | Paracentral lobule             | Left        | -9                          | -33      | 48       | 4.71     | <.001       | .001                   | 1.13             |
|                                                    | Middle cingulate cortex        | Left        | -3                          | -12      | 42       | 4.03     | <.001       | .012                   | .96              |
| Current depression < Healthy Control               | Ventromedial prefrontal cortex | Left        | -3                          | 39       | -9       | 3.99     | <.001       | .014                   | .95              |
| Remitted depression > Healthy Control <sup>c</sup> | Precuneus                      | Right       | 9                           | -48      | 48       | 4.85     | <.001       | .001                   | 1.19             |
|                                                    | Putamen                        | Left        | -21                         | 6        | 6        | 4.78     | <.001       | .001                   | 1.17             |
|                                                    | Caudate                        | Right       | 18                          | 18       | 6        | 4.67     | <.001       | .001                   | 1.14             |
|                                                    | Middle cingulate cortex        | Left        | -6                          | -9       | 48       | 4.43     | <.001       | .003                   | 1.08             |
|                                                    | Paracentral lobule             | Left        | -15                         | -33      | 57       | 4.28     | <.001       | .005                   | 1.05             |
|                                                    | Dorsolateral prefrontal cortex | Left        | -24                         | 42       | 21       | 4.24     | <.001       | .006                   | 1.04             |
|                                                    | Putamen                        | Right       | 27                          | 12       | -3       | 3.87     | <.001       | .02                    | .95              |
| Remitted depression < Healthy Control <sup>c</sup> | Ventromedial prefrontal cortex | Left        | -6                          | 36       | -9       | 5.34     | <.001       | <.001                  | 1.30             |
| Remitted depression > Current depression           | Putamen                        | Right       | 27                          | 18       | 6        | 2.98     | .002        | .24                    | .73              |
|                                                    | Caudate                        | Right       | 21                          | 21       | 6        | 2.85     | .003        | .31                    | .70              |
|                                                    | Putamen                        | Left        | -21                         | 9        | 6        | 2.79     | .003        | .35                    | .69              |
|                                                    | Dorsolateral prefrontal cortex | Left        | -24                         | 42       | 18       | 2.19     | .015        | .80                    | .54              |

<sup>a</sup> Montreal Neurological Institute coordinate;

<sup>b</sup> Family-wise error rate correction;

<sup>c</sup> Beck Depression Inventory scores were controlling for as well when comparing remitted depression with healthy control group.

**STable 4 Findings in Brain Regions Highlighted by Previous Studies Using Montreal Imaging Stress Task.**

| Study                   | Participants                             | Brain region                        | MNI coordinate <sup>a</sup> |     |     | Stress-induced activity                          | Stress-induced activity in our study | Group difference/ Association with cortisol                    | Related findings in our study           |
|-------------------------|------------------------------------------|-------------------------------------|-----------------------------|-----|-----|--------------------------------------------------|--------------------------------------|----------------------------------------------------------------|-----------------------------------------|
|                         |                                          |                                     | x                           | y   | z   |                                                  |                                      |                                                                |                                         |
| Ashare et al. 2016 (1)  | Nicotine withdrawal                      | Inferior frontal gyrus              | 38                          | 30  | 16  | Activation                                       | Activation                           | Increased activity in nicotine withdrawal                      | None                                    |
|                         | Nicotine non-withdrawal                  | Anterior/para cingulate cortex      | -2                          | 38  | 28  | Activation                                       | Activation                           | Increased activity in nicotine withdrawal                      | None                                    |
|                         |                                          | Precuneus                           | 2                           | -64 | 20  | Activation                                       | Activation                           | Increased activity in nicotine withdrawal                      | None                                    |
|                         |                                          | Supramarginal gyrus                 | 52                          | -26 | 30  | Activation                                       | Activation                           | Increased activity in nicotine withdrawal                      | None                                    |
| Castro et al. 2015 (2)  | Schizophrenia                            | Subgenual anterior cingulate cortex | 2                           | 44  | 0   | Activation in controls                           | Deactivation                         | Decreased activity in schizophrenia                            | Decreased activity in depression groups |
| Dedovic et al. 2014 (3) | Subclinical depression                   | Precuneus                           | —                           | —   | —   | Activation                                       | Activation                           | Decreased activity in subclinical depression                   | Increased activity in depression groups |
|                         |                                          | Temporoparietal junction            | -46                         | -52 | 24  | Activation in controls                           | Activation                           | Decreased activity in subclinical depression                   | None                                    |
|                         |                                          | Insula                              | 40                          | -6  | 10  | Activation in controls                           | Activation                           | Decreased activity in subclinical depression                   | None                                    |
|                         |                                          | Hippocampus                         | —                           | —   | —   | Activation                                       | Activation/ Deactivation             | None                                                           | None                                    |
|                         |                                          | Subgenual anterior cingulate cortex | 8                           | 22  | -4  | Deactivation                                     | Deactivation                         | None                                                           | Decreased activity in depression groups |
|                         |                                          | Medial orbitofrontal cortex         | -3                          | 43  | -20 | Deactivation in subclinical depression           | Deactivation                         | None                                                           | Decreased activity in depression groups |
| Lord et al. 2012 (4)    | Postpartum obsessive-compulsive disorder | Orbitofrontal cortex                | 6                           | 36  | -17 | Activation in patients, deactivation in controls | Deactivation                         | Increased activity in postpartum obsessive-compulsive disorder | Decreased activity in depression groups |
|                         |                                          | Superior temporal gyrus             | 48                          | 12  | -32 | Activation in patients, deactivation in controls | Deactivation                         | Increased activity in postpartum obsessive-compulsive disorder | None                                    |
|                         |                                          | Insula                              | -45                         | -4  | -2  | Activation in patients, deactivation in controls | Activation                           | Increased activity in postpartum obsessive-compulsive disorder | None                                    |
|                         |                                          | Medial prefrontal cortex            | 6                           | 36  | -17 | Activation in patients, deactivation in controls | Deactivation                         | Increased activity in postpartum obsessive-compulsive disorder | Decreased activity in depression groups |

|                           |                             |                                |     |     |     |                                                                  |                             |                                                                     |                                                                                          |
|---------------------------|-----------------------------|--------------------------------|-----|-----|-----|------------------------------------------------------------------|-----------------------------|---------------------------------------------------------------------|------------------------------------------------------------------------------------------|
| Pruessner et al. 2008 (5) | Healthy subjects            | Hippocampus                    | —   | —   | —   | Deactivation                                                     | Activation/<br>Deactivation | Deactivation positively correlated with cortisol responses          | None                                                                                     |
|                           |                             | Medial orbitofrontal cortex    | 17  | 44  | -16 | Deactivation                                                     | Deactivation                | Decreased activity in cortisol responders                           | Decreased activity in depression groups, deactivation correlated with cortisol increases |
|                           |                             | Anterior cingulate cortex      | -12 | 47  | -3  | Deactivation in cortisol responders, activation in nonresponders | Activation                  | Decreased activity in cortisol responders relative to nonresponders | None                                                                                     |
|                           |                             | Dorsolateral prefrontal cortex | -29 | 44  | 20  | Deactivation in cortisol responders, activation in nonresponders | Activation                  | Decreased activity in cortisol responders relative to nonresponders | Increased activity in remitted depression                                                |
| Soliman et al. 2011 (6)   | Negative symptom schizotypy | Putamen                        | -26 | -16 | 10  | Deactivation                                                     | Activation                  | Decreased activity in Negative symptom schizotypy                   | Increased activity in remitted depression                                                |
|                           |                             | Caudate body                   | -10 | 8   | 10  | Deactivation                                                     | Activation                  | Decreased activity in Negative symptom schizotypy                   | None                                                                                     |
|                           | Positive symptom schizotypy | Amygdala-parahippocampal gyrus | -22 | 0   | -18 | Deactivation                                                     | Deactivation                | Decreased activity in Negative symptom schizotypy                   | None                                                                                     |
|                           |                             | Anterior cingulate             | -4  | 42  | -2  | Deactivation                                                     | Deactivation                | Decreased activity in Negative symptom schizotypy                   | Decreased activity in depression groups                                                  |
|                           |                             | Cingulate white matter         | 18  | -4  | 26  | Activation                                                       | Activation                  | Decreased activity in Negative symptom schizotypy                   | None                                                                                     |
|                           |                             | Superior frontal white matter  | 26  | -26 | 28  | Activation                                                       | Activation                  | Decreased activity in Negative symptom schizotypy                   | None                                                                                     |
| Wheelock et al. 2016 (7)  | Healthy subjects            | Ventromedial prefrontal cortex | 6   | 62  | -10 | Activation in nonresponders                                      | Deactivation                | Decreased activity in cortisol responders                           | Decreased activity in depression groups, deactivation correlated with cortisol increases |
|                           |                             | Posterior cingulate cortex     | -10 | 48  | 30  | Activation in nonresponders                                      | Activation                  | Decreased activity in cortisol responders                           | None                                                                                     |

<sup>a</sup>Montreal Neurological Institute coordinate.



**SFigure 1 Brain Activation during Stress Processing.**

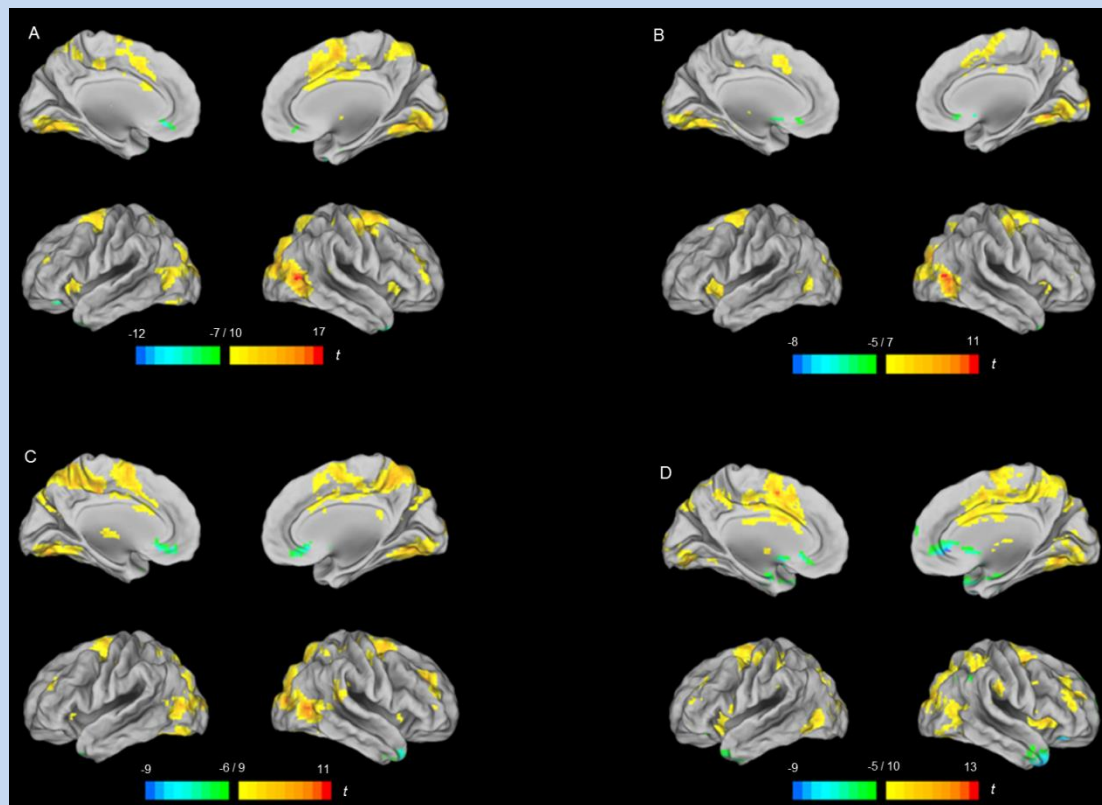

Significantly activated regions ( $p < .05$ , family-wise error rate corrected) of the experimental  $>$  control contrast in A: all subjects as a whole; B: healthy control group; C: current depression group; D: remitted depression group.
